# Supplementary material
Source: Research Square preprint supplement (doi:10.21203/rs.3.rs-8821294/v1)

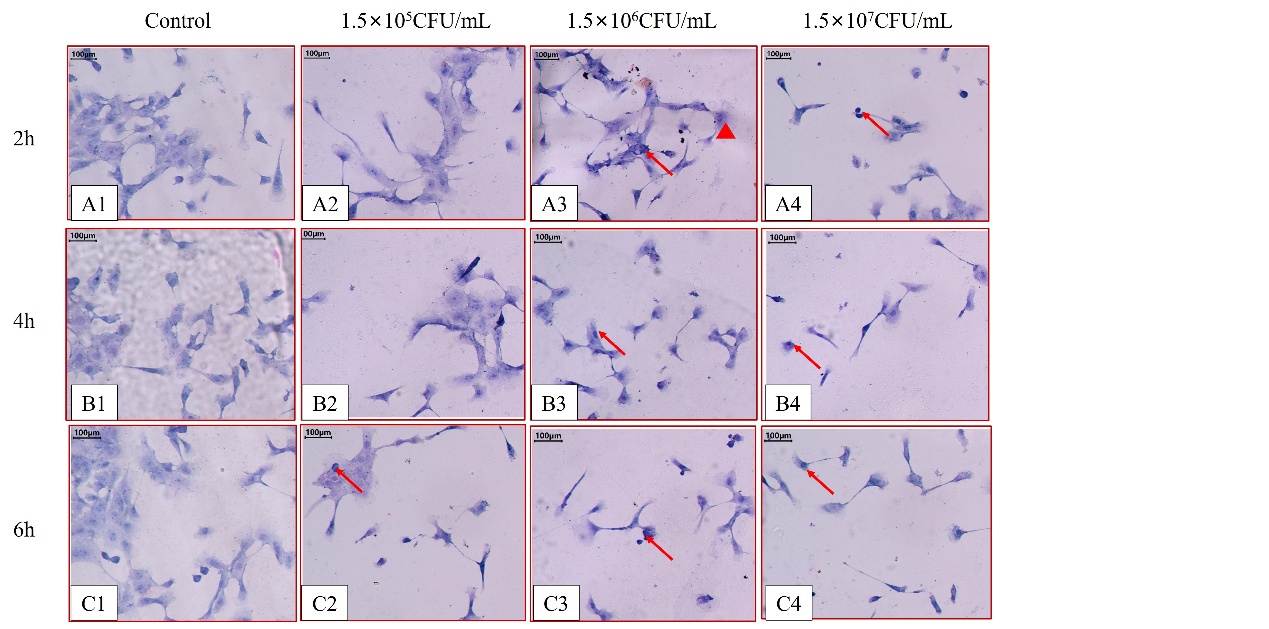

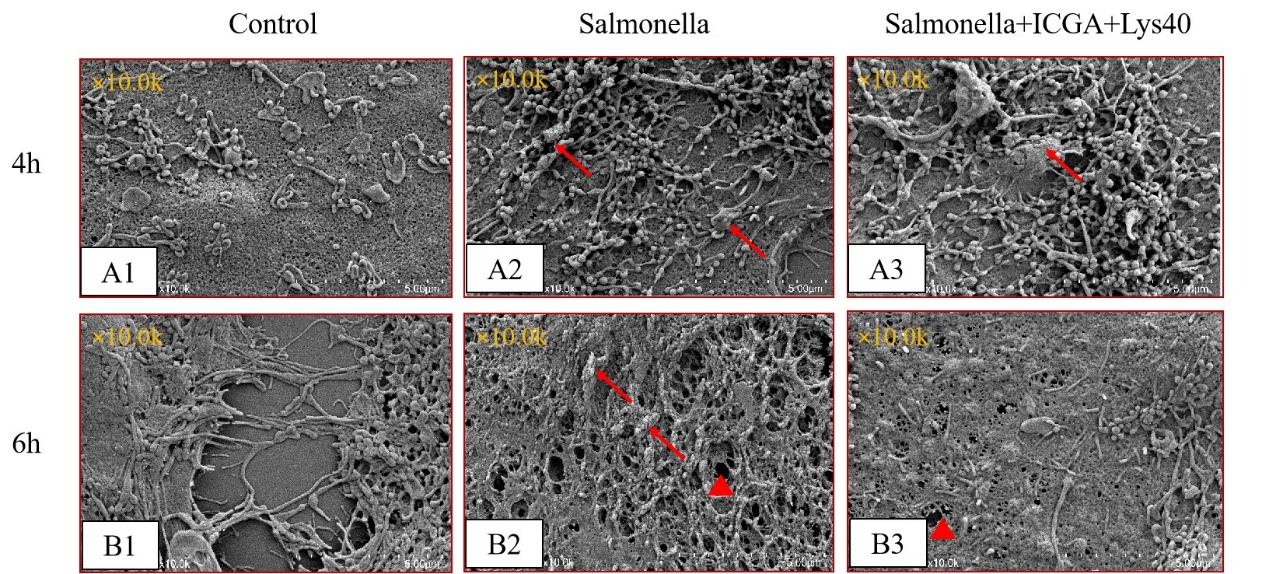

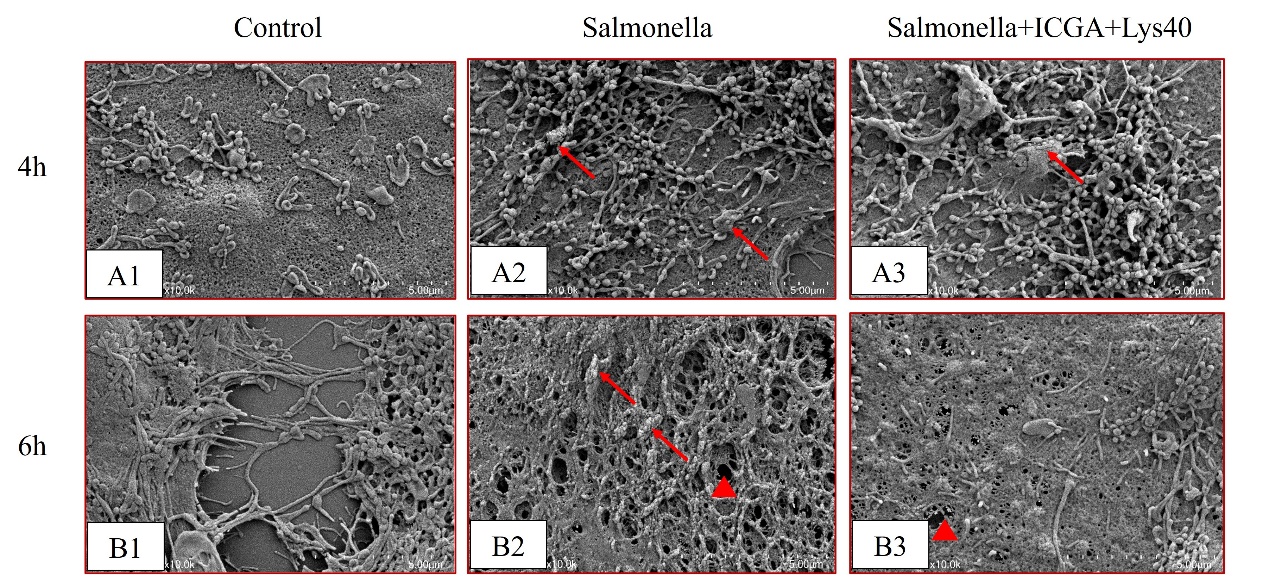

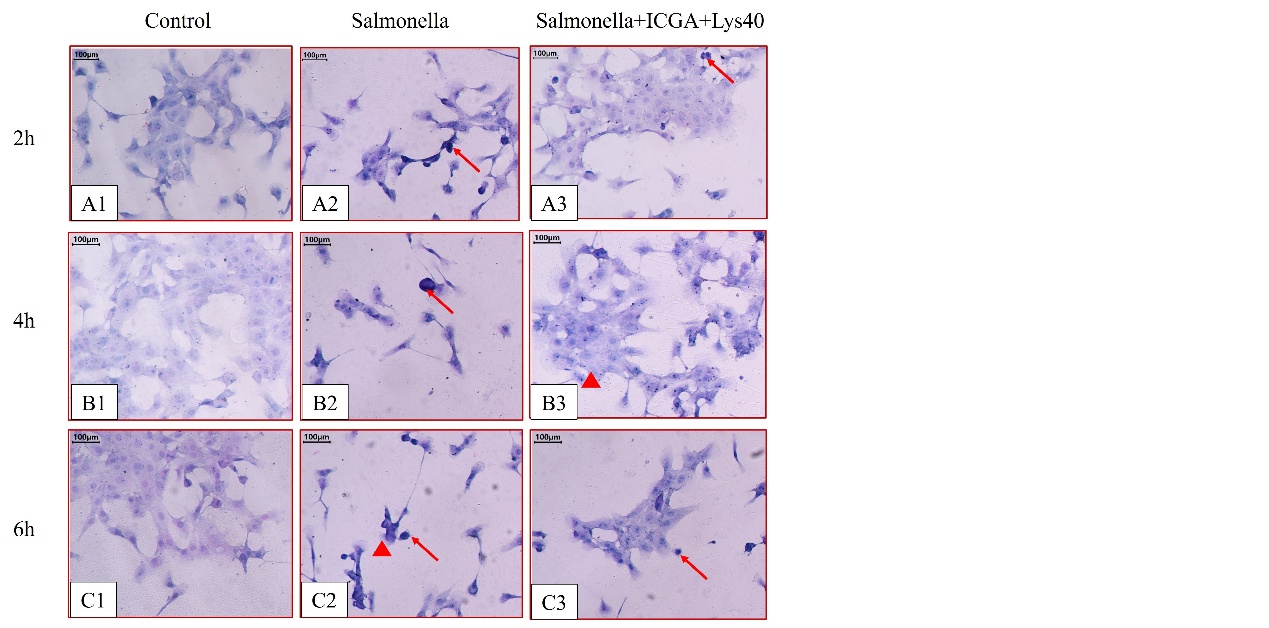

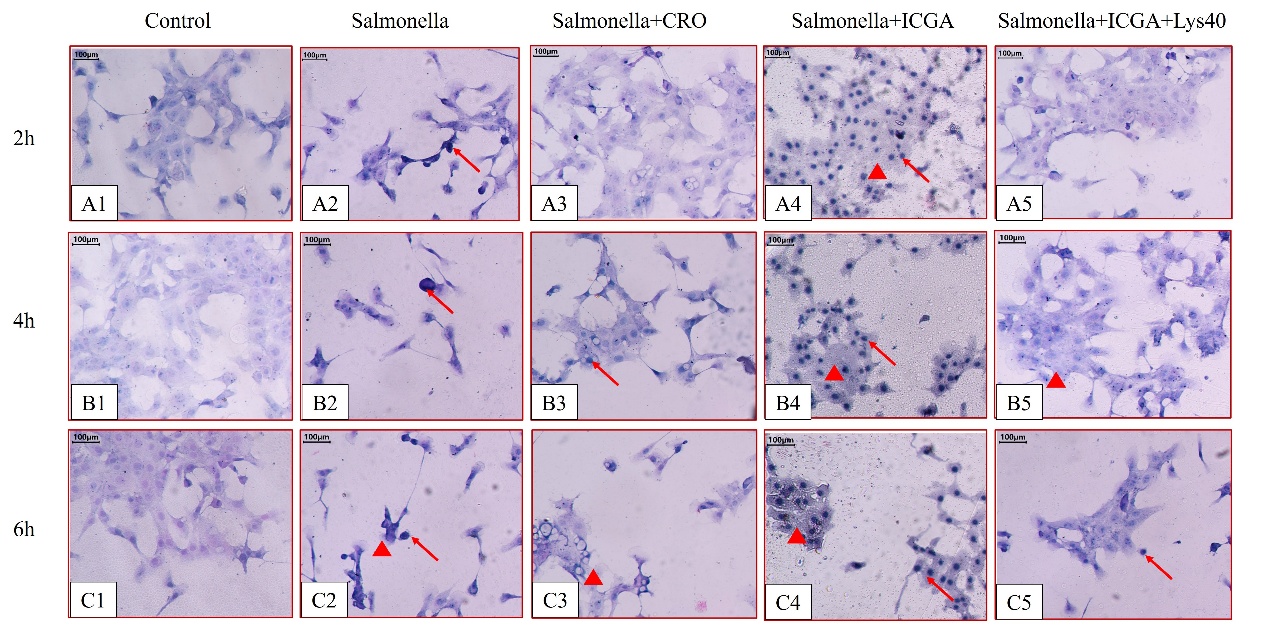

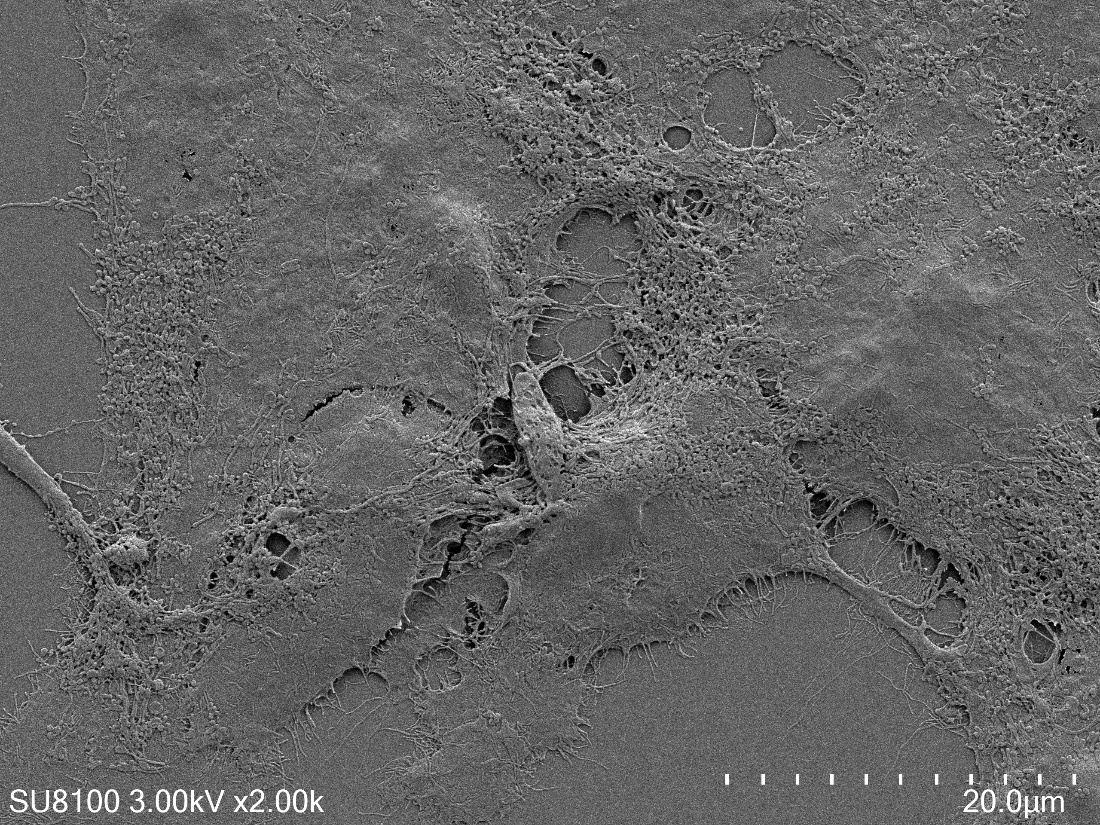

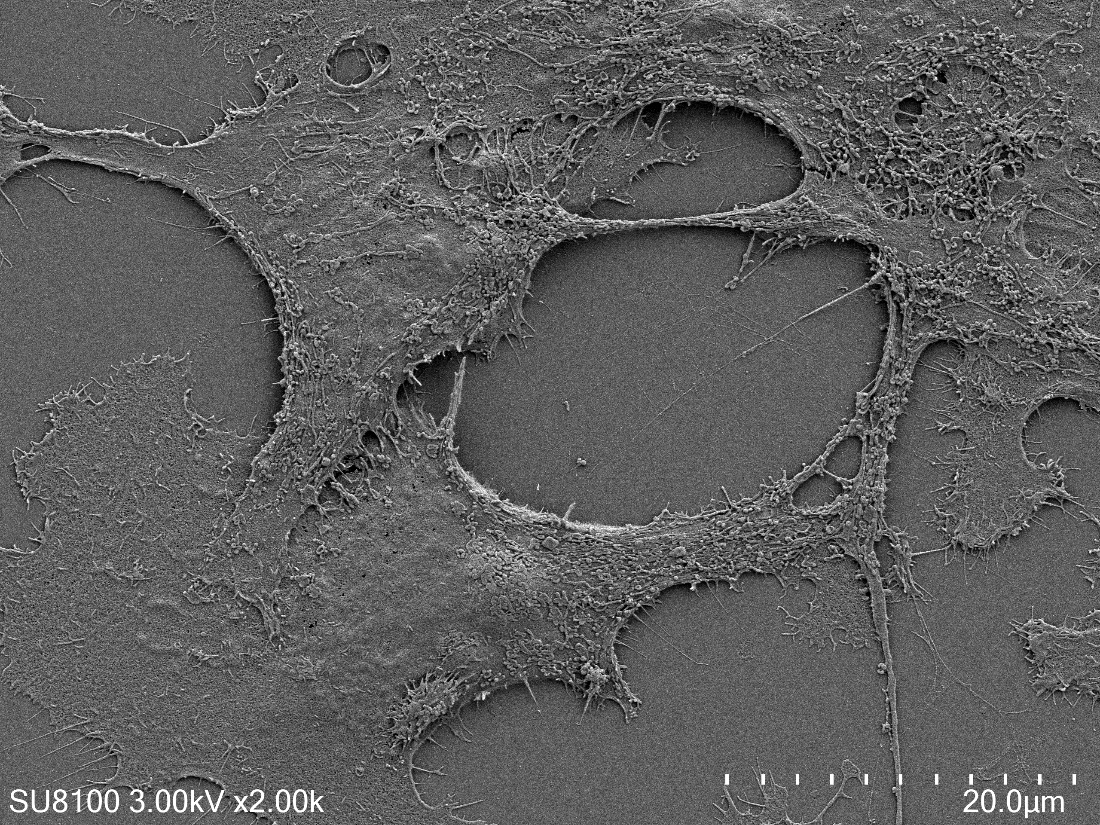

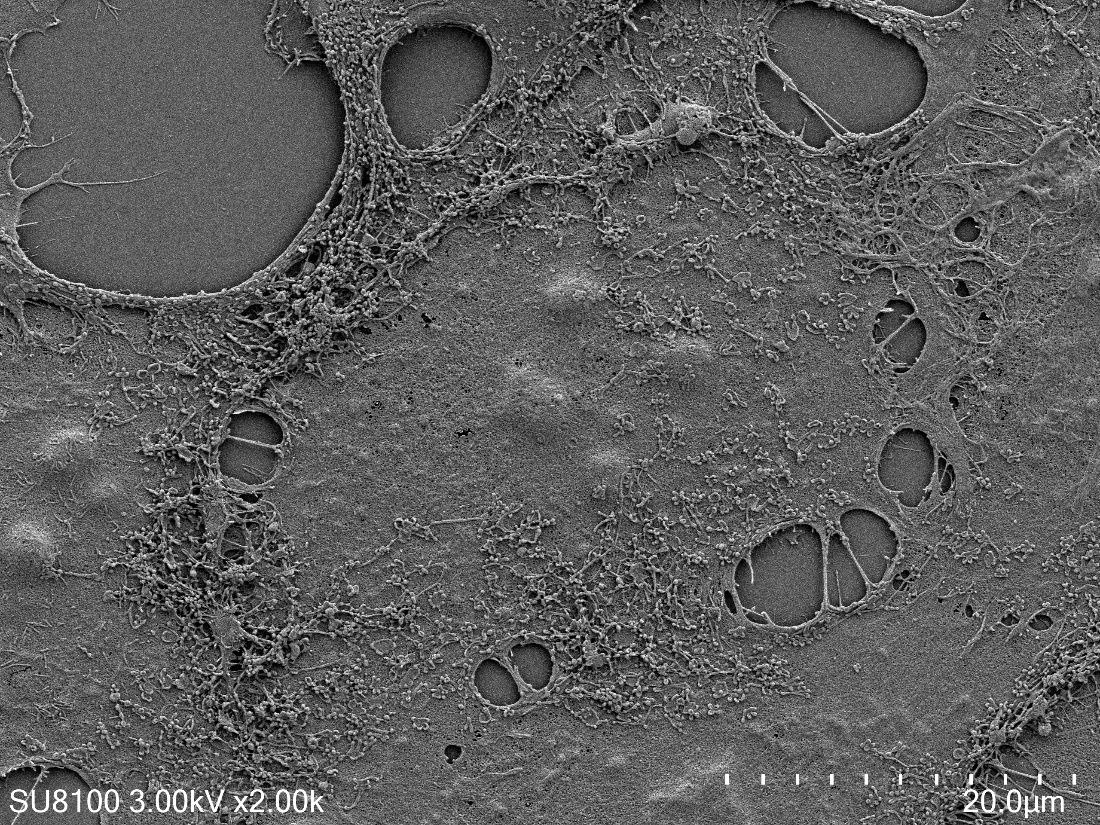

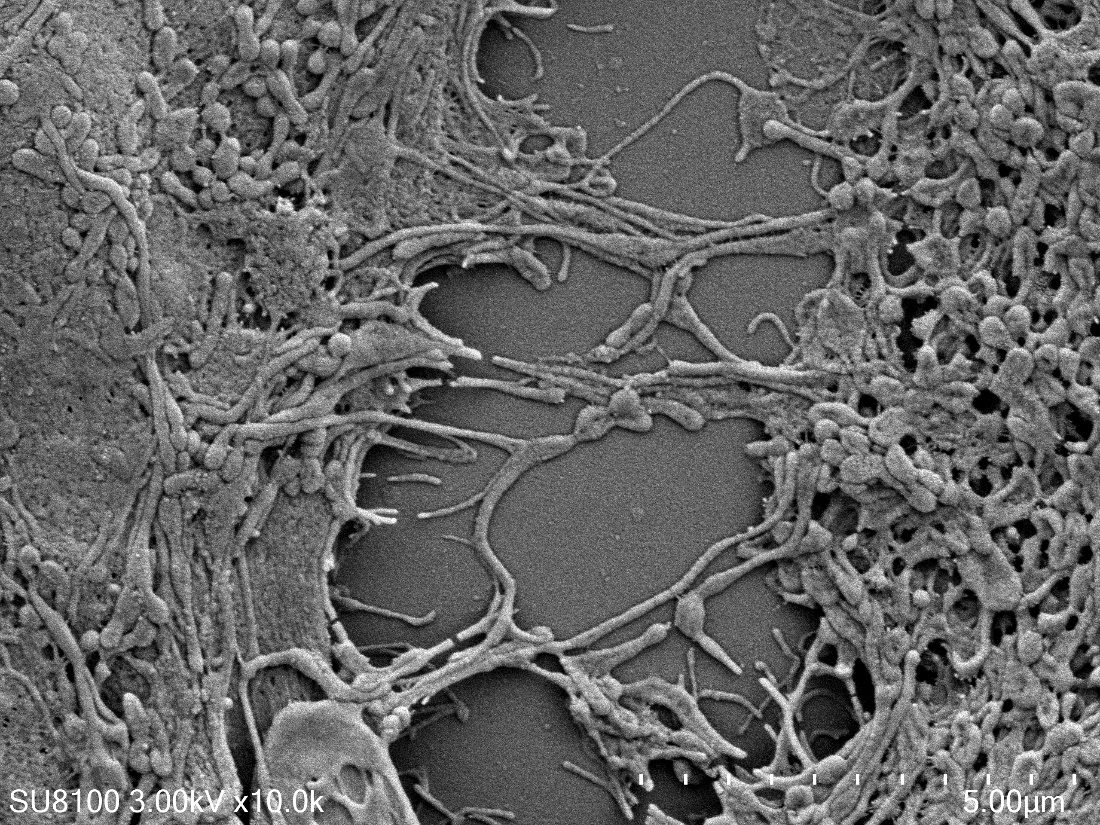

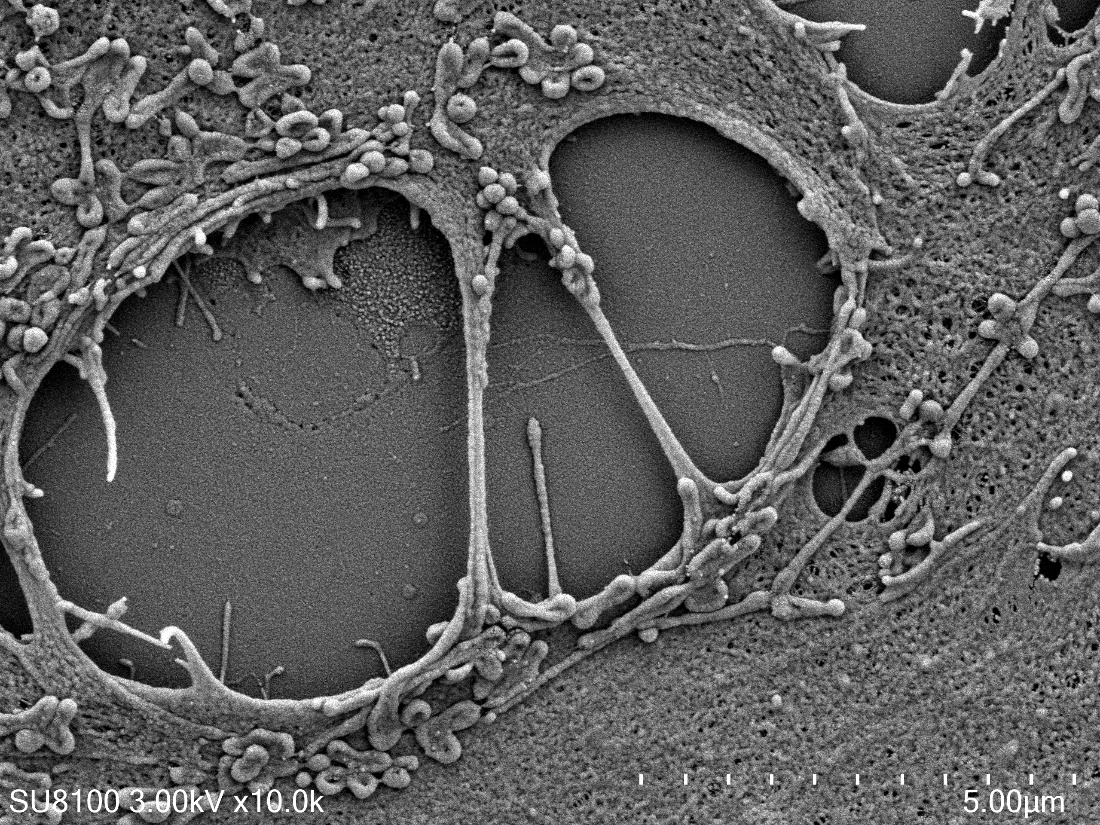

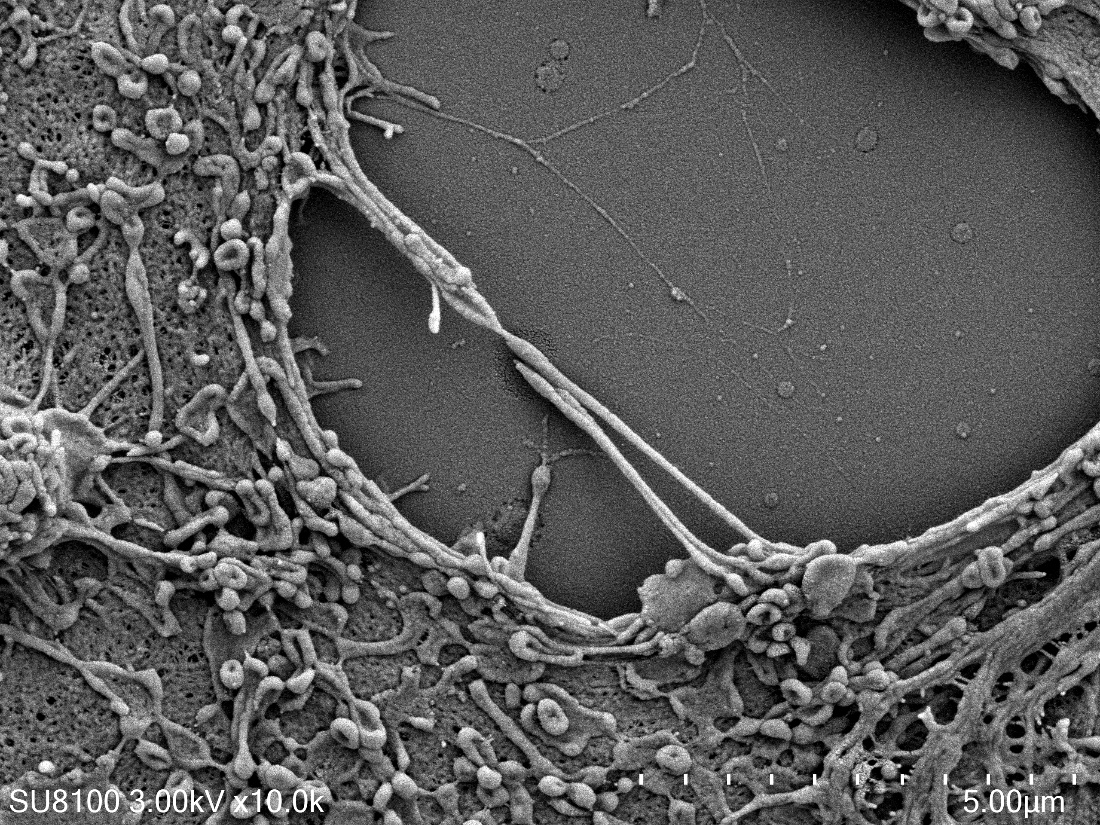

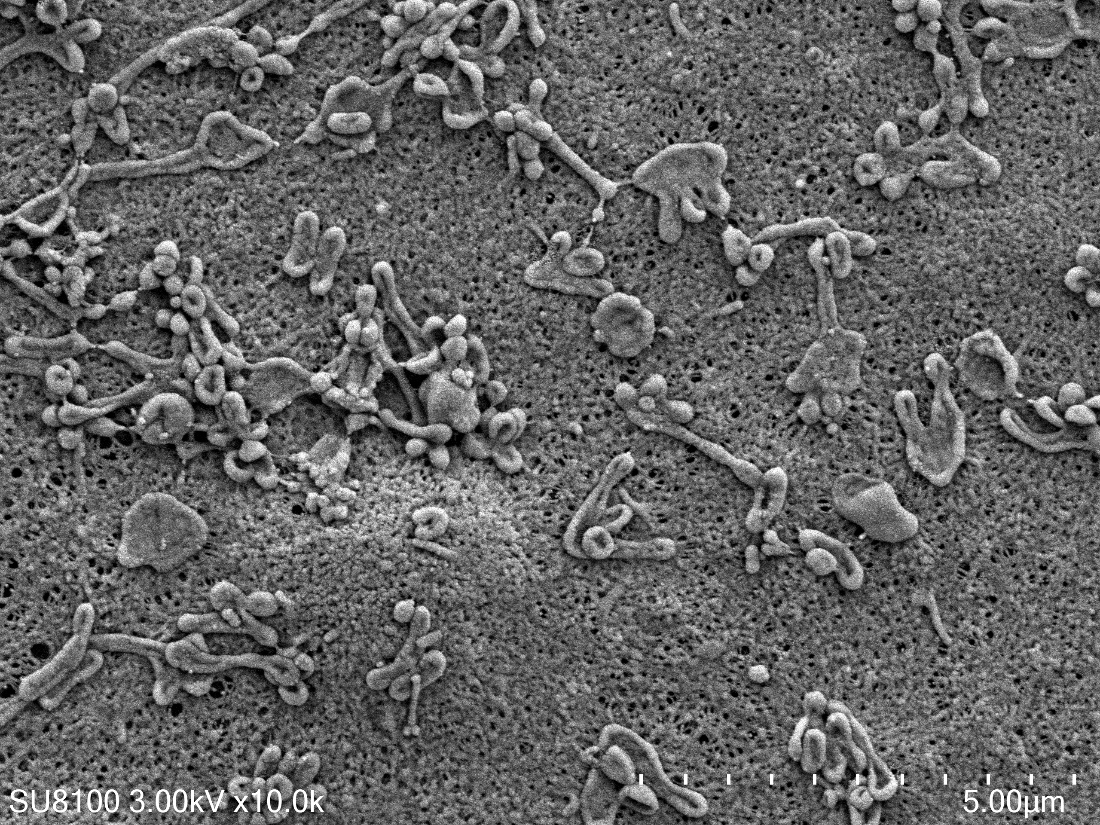


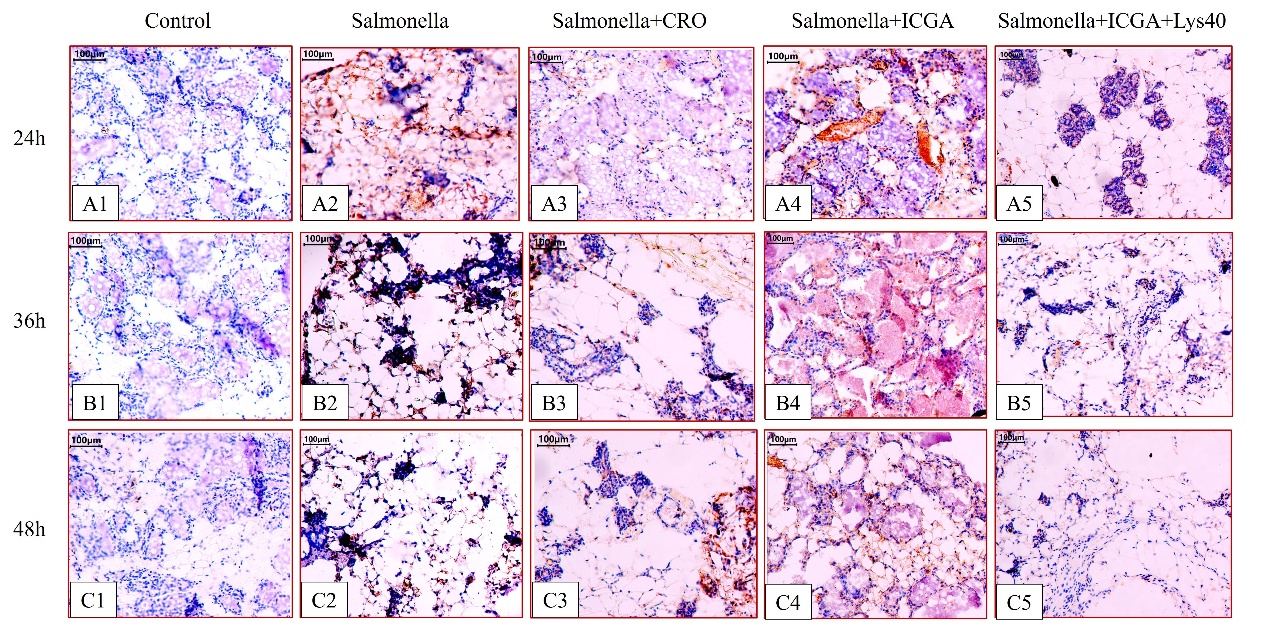

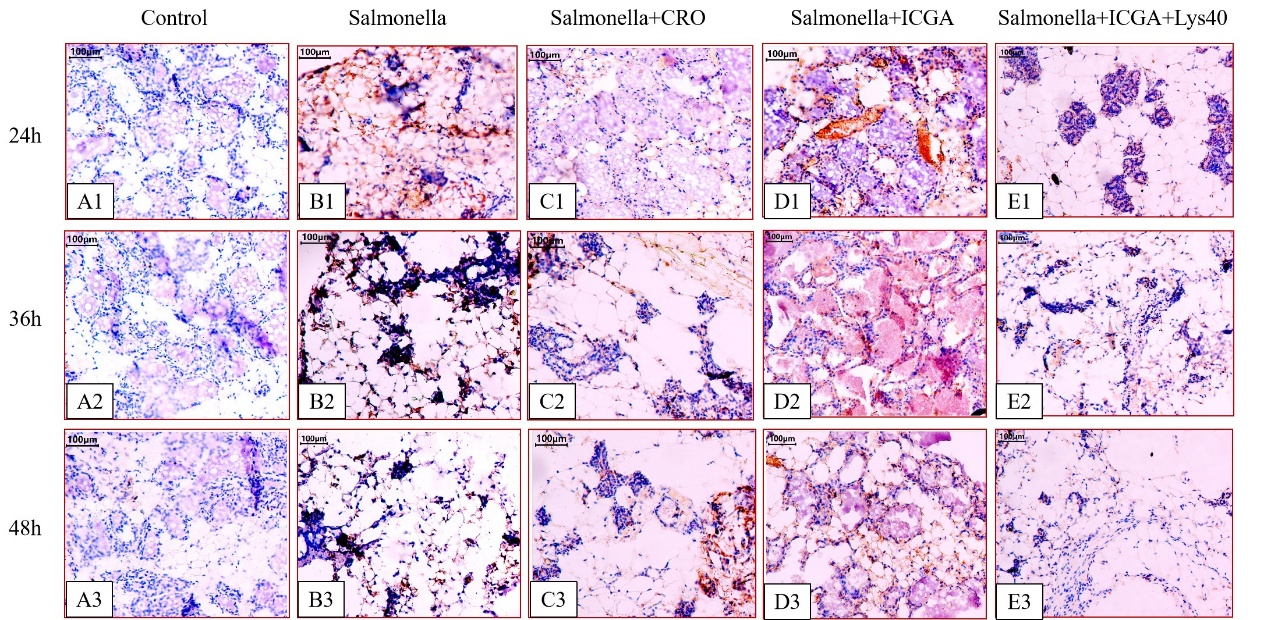

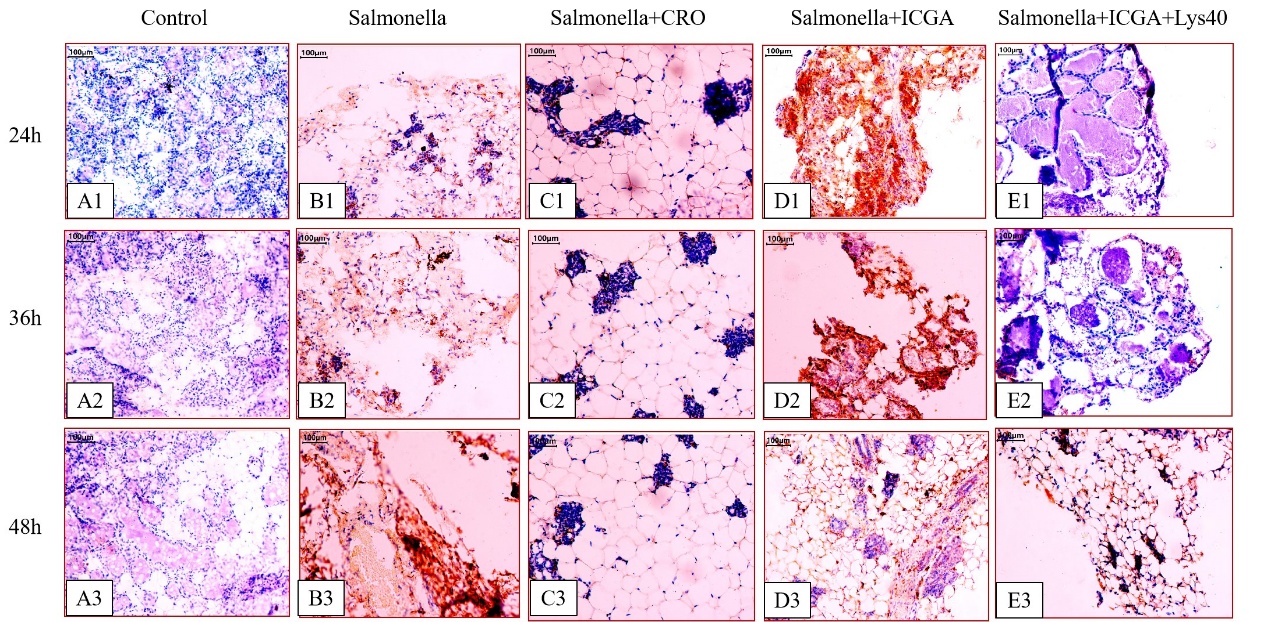

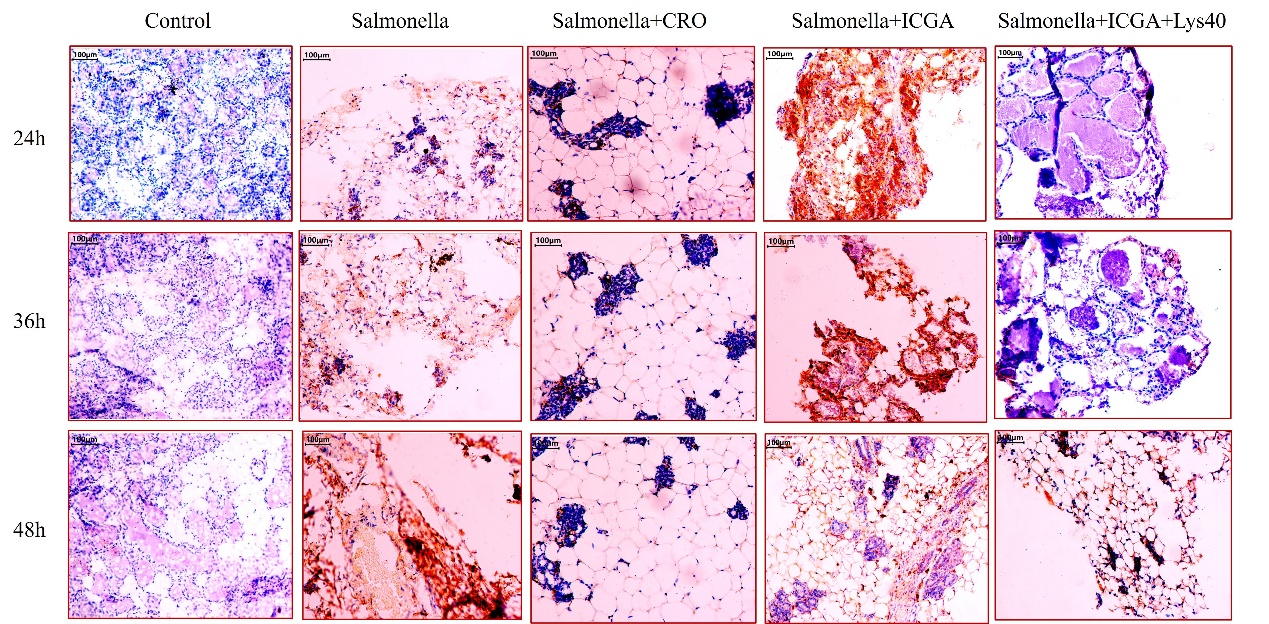

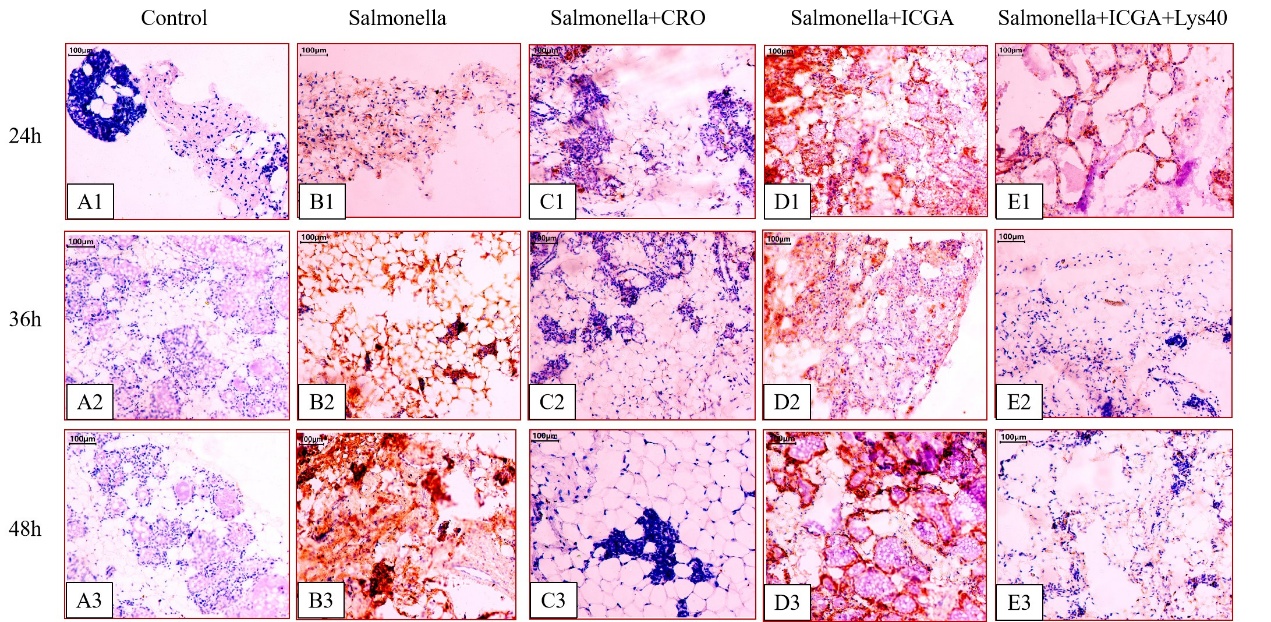

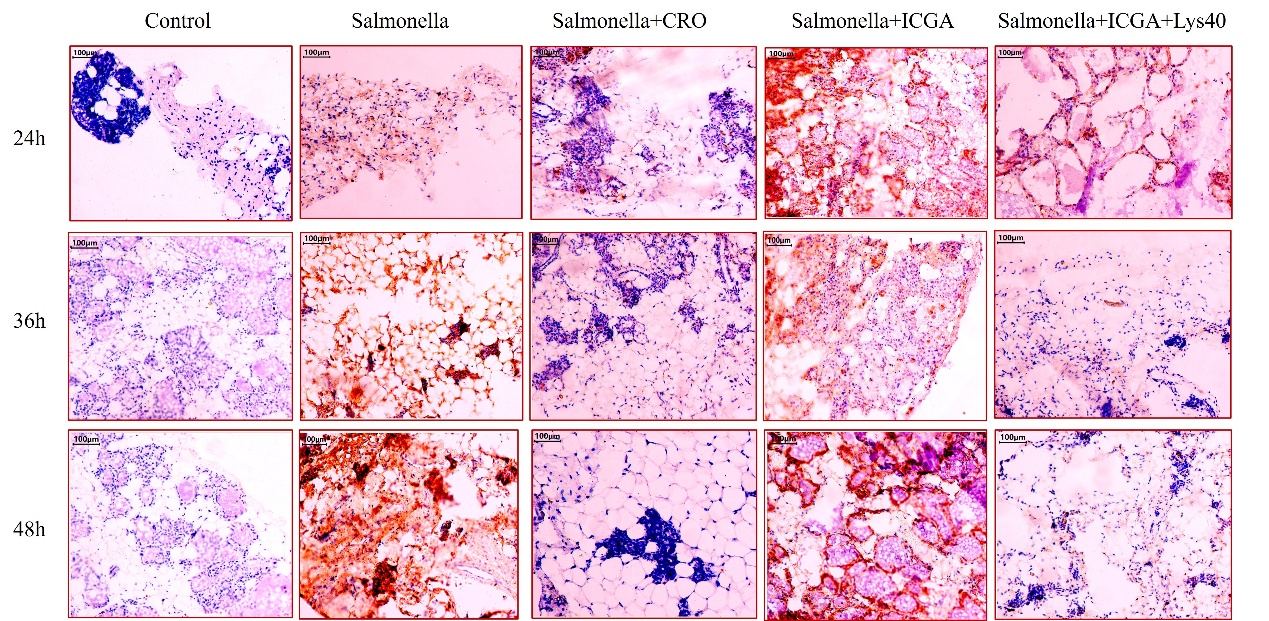


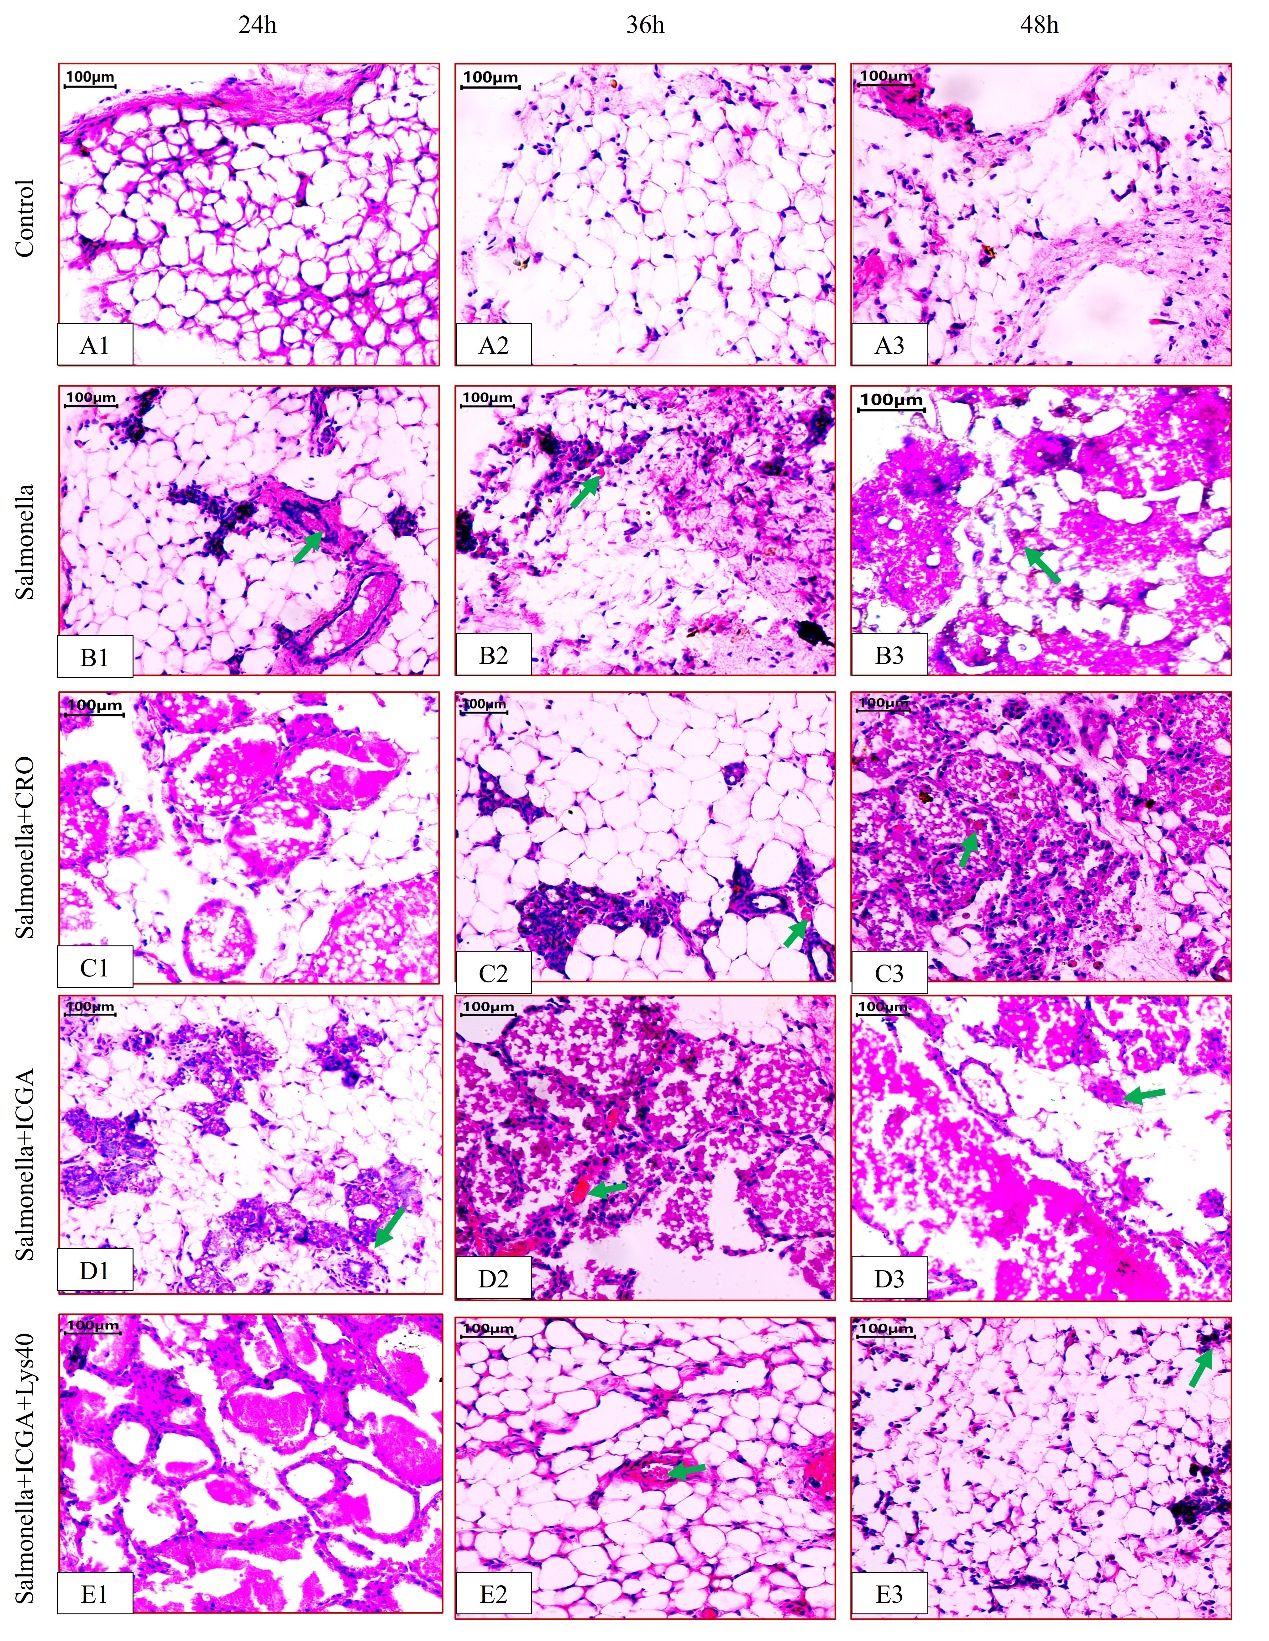

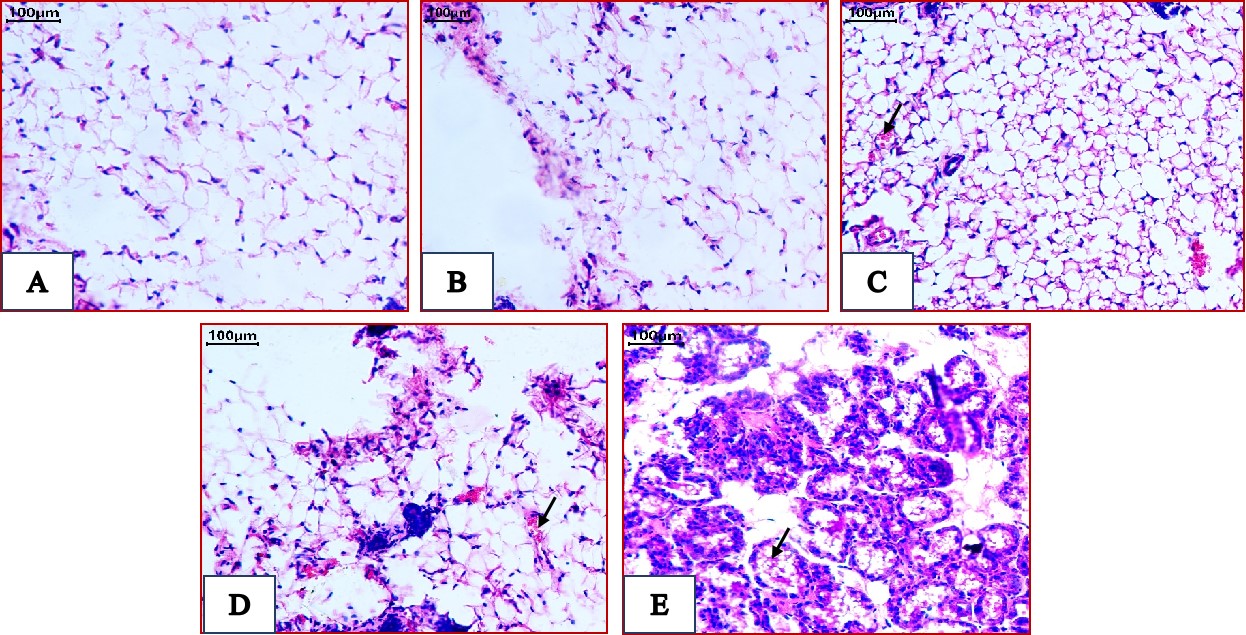

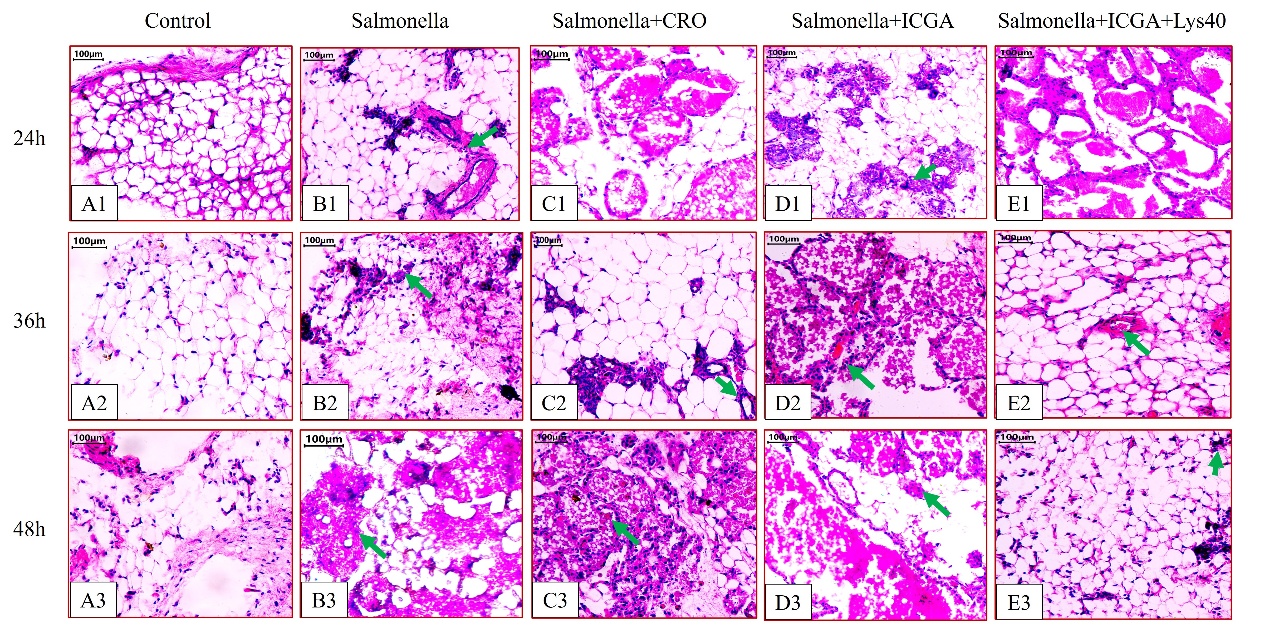

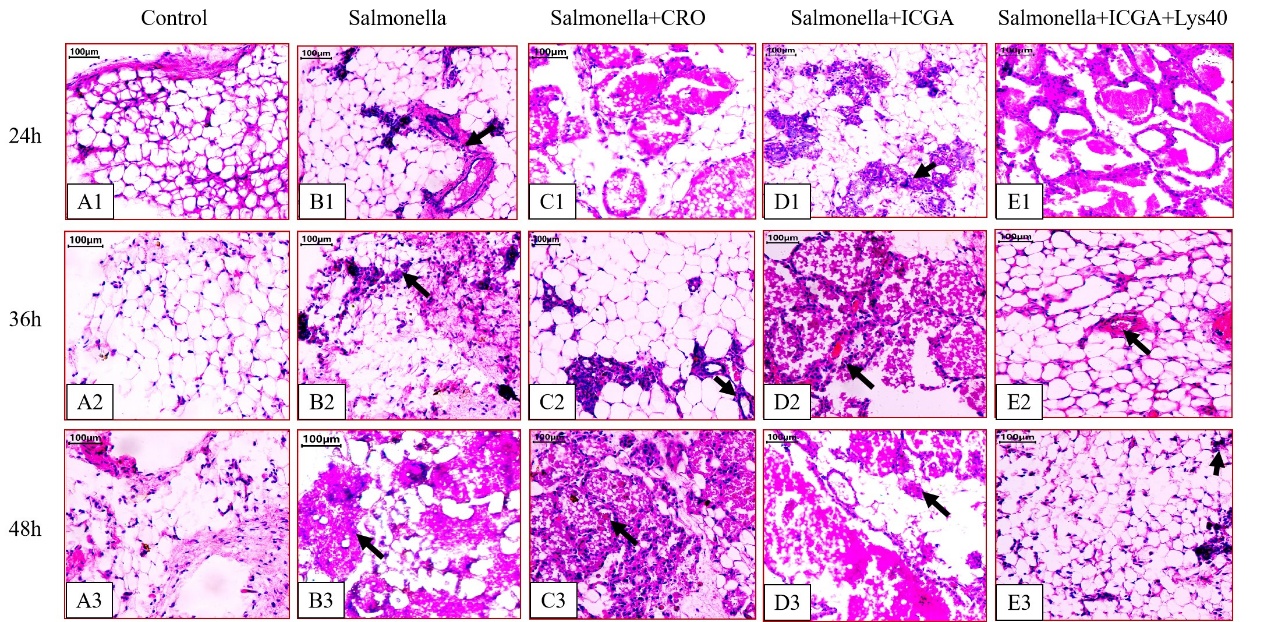

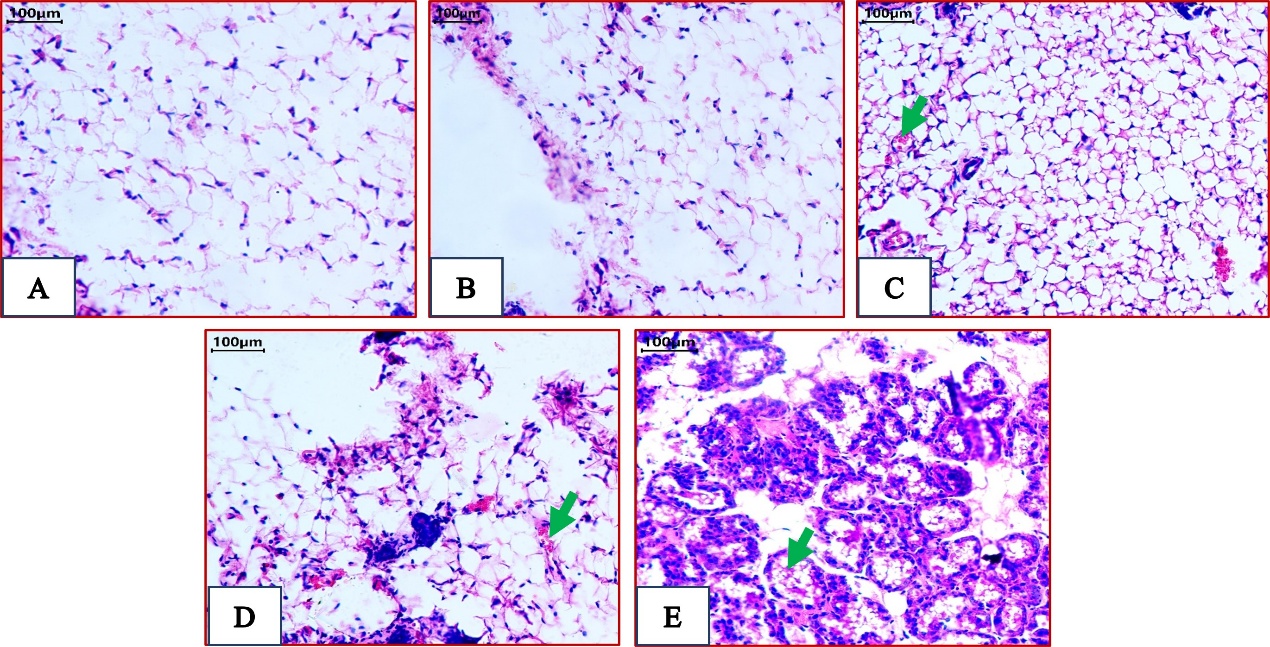

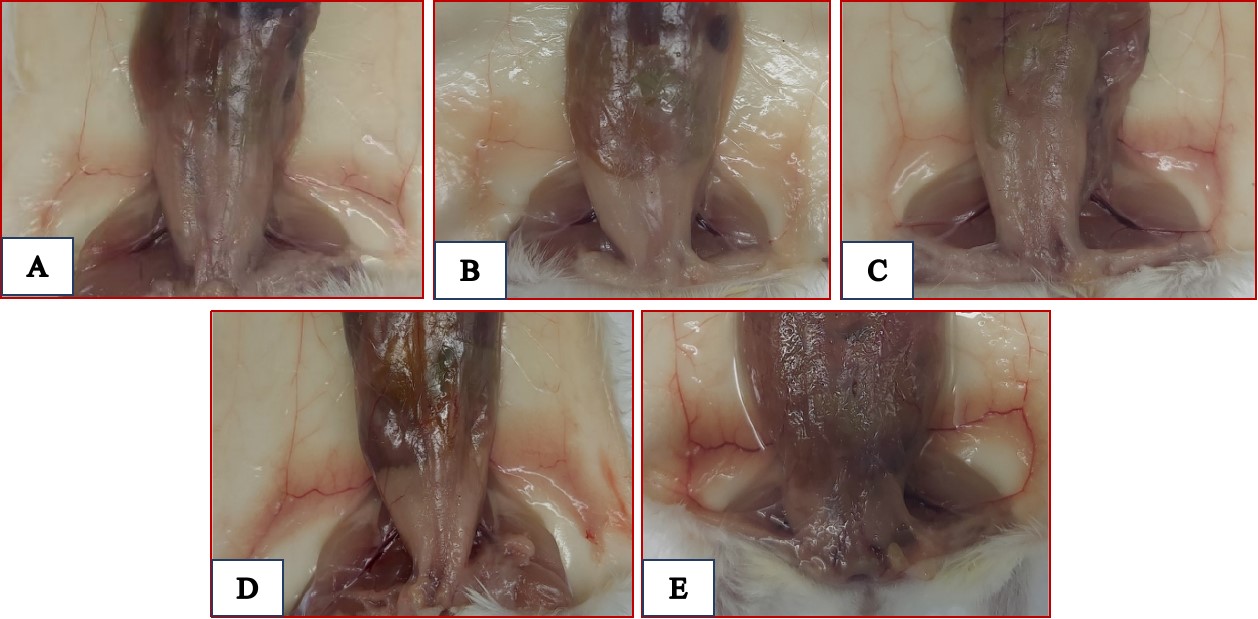

Supplement: Supplementary file 1 [file 25d4708e37fd1507b11f6ae8.docx]
